# Supplementary material for: Linkage Disequilibrium and Inversion-Typing of the Drosophila melanogaster Genome Reference Panel
Source: PubMed Central journal article supplement (PMC4528326; doi:10.1534/g3.115.019554), 2015-06-10
Supplement: supp_g3.115.019554_019554SI.pdf [file supp_g3.115.019554_019554SI.pdf]

## Linkage Disequilibrium and Inversion-Typing of the *Drosophila melanogaster* Genome Reference Panel

David Houle<sup>\*1</sup>  
Eladio J. Márquez<sup>\*2</sup>  
Department of Biological Science  
Florida State University  
Tallahassee, FL 32308

\*Department of Biological Science, Florida State University, Tallahassee, FL 32306-4295, USA.

<sup>1</sup>Corresponding author: Department of Biological Science, Florida State University, Tallahassee, FL 32306-4295, USA. E-mail: [dhoule@bio.fsu.edu](mailto:dhoule@bio.fsu.edu)

<sup>2</sup> Current address: The Jackson Laboratory for Genomic Medicine, Farmington, CT 06030, USA

**DOI: 10.1534/g3.115.019554**

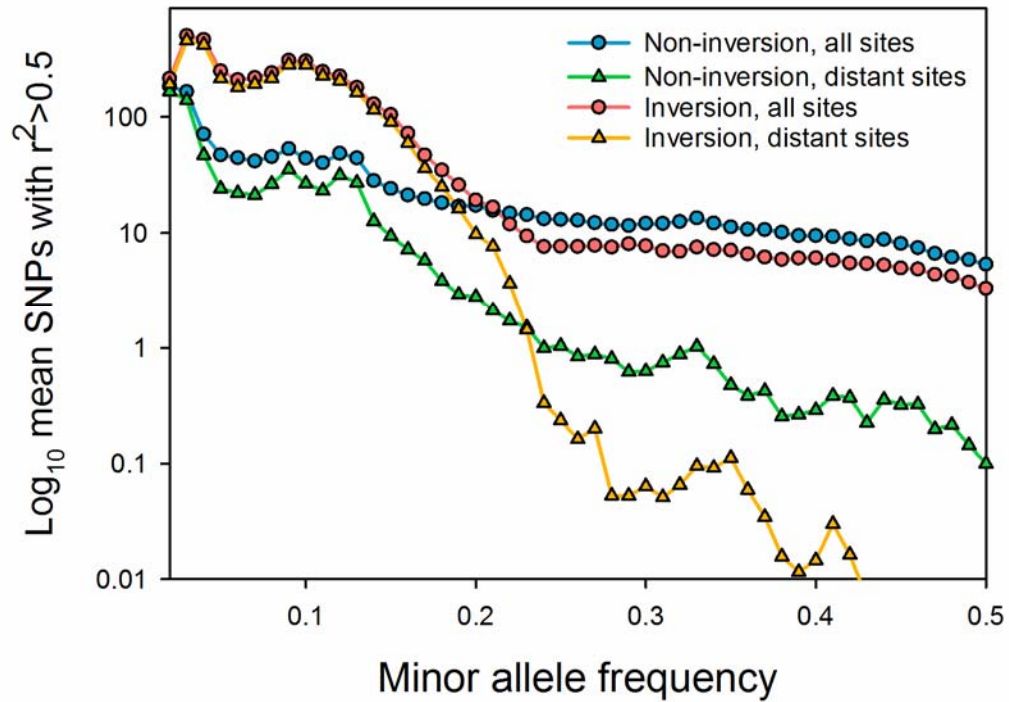

**Figure S1** Mean number of sites correlated with variant sites at  $r^2 > 0.5$  as a function of minor allele frequency for sites within and outside common inversions. We treated the distal segment of chromosome 3R as part of In(3R)Mo (Corbett-Detig and Hartl 2012).

## Supporting Files

All supporting files are archived and available at <http://dx.doi.org/10.5061/dryad.06jt7>

### File S1

**HouleMarquezSASfiles.zip . Zip file with two SAS programs and example data set.** Gcorrlimits.sas is a stand-alone program that demonstrates how we calculated the limits on which allele frequencies can be correlated at  $r^2 \geq 0.5$ . CalcHighCorr.sas reads the SAS data set gcorrexampledatsas7bdat to demonstrate the calculation of correlations as a measure of linkage disequilibrium. Programs are written in SAS 9.3 (SAS Institute 2011).

### File S2

**LD205results.zip. Correlations of all SNP pairs with  $r^2 \geq 0.5$  in the Freeze2 of the DGRP.** Zip file contains separate csv files for each chromosome arm.

### File S3

**HouleMarquezF3\_PCscores.csv.** Supporting Table: Inversion-typing of DGRP lines for the three common inversions In(2L)t, In(2R)NS, and In(3R)Mo, and heterozygosity of chromosome regions.

**Table S1 Inferred kilobase pairs of African ancestry in homozygous inverted regions.**

| Chromosome | Predicted Karyotype | Consensus*   |     | Mismatch†      |   |
|------------|---------------------|--------------|-----|----------------|---|
|            |                     | Mean ± S.D.  | N   | Mean ± S.D.    | N |
| 2L         | Standard            | 2,022 ±1,081 | 161 | --             |   |
|            | In(2L)t             | 13,605±2,494 | 19  | 14,713 ± 1,098 | 4 |
| 2R         | Standard            | 412 ±194     | 161 | 5,840          | 1 |
|            | In(2R)NS            | 6,385±3,057  | 7   | 874            | 1 |
| 3R         | Standard            | 1,504 ±3,459 | 175 | 1,051± 466     | 2 |
|            | In(3R)MO            | 80 ± 67      | 16  | 64 ± 40        | 4 |

\* Consensus lines are assigned the same inversion type by our LD-based PC classification and by previous studies (Corbett-Detig and Hartl 2012; Huang et al. 2012).

† Mismatch lines are assigned an LD PC classification that disagrees with one of the previous studies.

### Literature Cited

- Corbett-Detig, R.B., and D.L. Hartl, 2012 Population Genomics of Inversion Polymorphisms in *Drosophila melanogaster*. *PLoS Genetics* 8: e1003056.
- Huang, W., S. Richards, M.A. Carbone, D. Zhu, R.R.H. Anholt *et al.*, 2012 Epistasis dominates the genetic architecture of *Drosophila* quantitative traits. *Proceedings of the National Academy of Sciences of the United States of America* 109: 15553-15559.
- SAS Institute, Inc., 2011 *The SAS System for Windows*, Release 9.3. SAS Institute, Cary, NC.
