# Supplementary material for: Linkage Disequilibrium and Inversion-Typing of the Drosophila melanogaster Genome Reference Panel
Source: PubMed Central journal article supplement (PMC4528326; doi:10.1534/g3.115.019554), 2015-06-10
Supplement: supp_g3.115.019554_FigureS1.pdf [file supp_g3.115.019554_FigureS1.pdf]

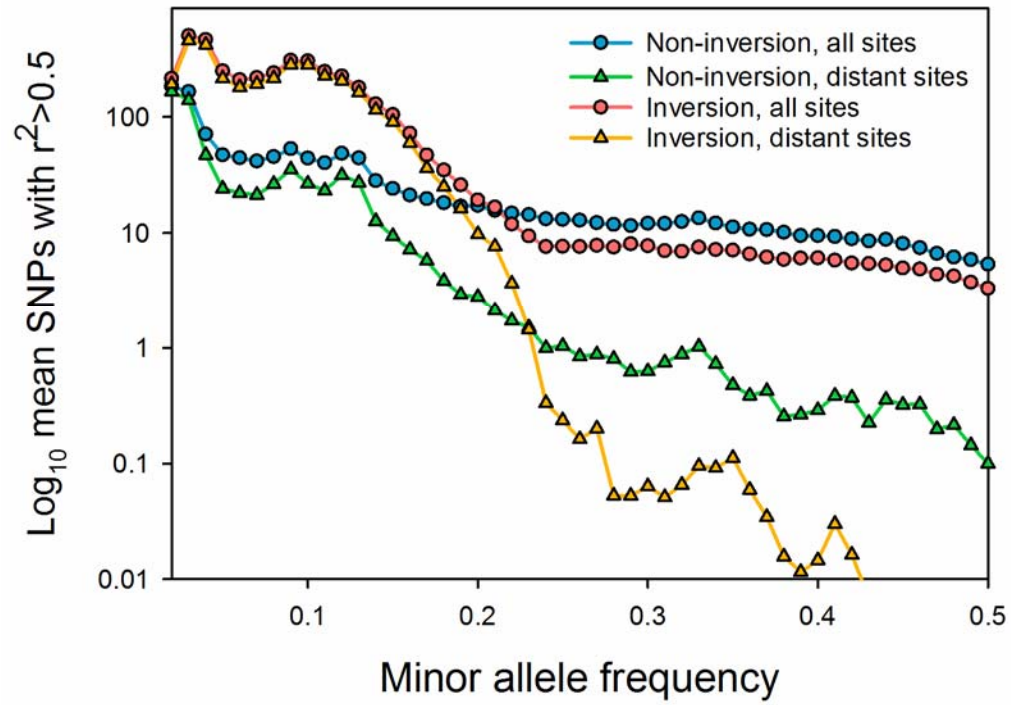

**Figure S1** Mean number of sites correlated with variant sites at  $r^2 > 0.5$  as a function of minor allele frequency for sites within and outside common inversions. We treated the distal segment of chromosome 3R as part of In(3R)Mo (Corbett-Detig and Hartl 2012).
