# Supplementary material for: Linkage Disequilibrium and Inversion-Typing of the Drosophila melanogaster Genome Reference Panel
Source: PubMed Central journal article supplement (PMC4528326; doi:10.1534/g3.115.019554), 2015-06-10
Supplement: supp_g3.115.019554_TableS1.pdf [file supp_g3.115.019554_TableS1.pdf]

**Table S1 Inferred kilobase pairs of African ancestry in homozygous inverted regions.**

| Chromosome | Predicted Karyotype | Consensus*   |     | Mismatch†      |   |
|------------|---------------------|--------------|-----|----------------|---|
|            |                     | Mean ± S.D.  | N   | Mean ± S.D.    | N |
| 2L         | Standard            | 2,022 ±1,081 | 161 | --             |   |
|            | In(2L)t             | 13,605±2,494 | 19  | 14,713 ± 1,098 | 4 |
| 2R         | Standard            | 412 ±194     | 161 | 5,840          | 1 |
|            | In(2R)NS            | 6,385±3,057  | 7   | 874            | 1 |
| 3R         | Standard            | 1,504 ±3,459 | 175 | 1,051± 466     | 2 |
|            | In(3R)MO            | 80 ± 67      | 16  | 64 ± 40        | 4 |

\* Consensus lines are assigned the same inversion type by our LD-based PC classification and by previous studies (Corbett-Detig and Hartl 2012; Huang et al. 2012).

† Mismatch lines are assigned an LD PC classification that disagrees with one of the previous studies.
